# Supplementary material
Source: PubMed Central journal article supplement (PMC11482189)
Supplement: boe-15-10-5773-s001.pdf [file boe-15-10-5773-s001.pdf]

## Prediction of the response to antiangiogenic sunitinib therapy by non-invasive hybrid diffuse optics in renal cell carcinoma: supplement

**MIGUEL MIRELES,<sup>1,2,†</sup>  GABRIELA JIMÉNEZ-VALERIO,<sup>2,†</sup> **JORDI MORALES-DALMAU,<sup>1</sup> JOHANNES D. JOHANSSON,<sup>1,3</sup>  MAR MARTÍNEZ-LOZANO,<sup>4</sup> ERNESTO E. VIDAL-ROSAS,<sup>1,5</sup>  VALENTÍ NAVARRO-PÉREZ,<sup>6</sup> DAVID R. BUSCH,<sup>7</sup>  ORIOL CASANOVAS,<sup>4</sup> TURGUT DURDURAN,<sup>1,8</sup>  AND CLARA VILCHES<sup>1,\*</sup> ****

<sup>1</sup>*ICFO - Institut de Ciències Fotòniques, The Barcelona Institute of Science and Technology, 08860 Barcelona, Spain*

<sup>2</sup>*Computational Optics and Translational Imaging Lab, Northeastern University, Boston, Massachusetts 02115, USA*

<sup>3</sup>*Department of Biomedical Engineering, Linköping University, SE-581 83 Linköping, Sweden*

<sup>4</sup>*Tumor Angiogenesis Group, ProCURE, Catalan Institute of Oncology - IDIBELL, 08908 L'Hospitalet de Llobregat, Spain*

<sup>5</sup>*Digital Health and Biomedical Engineering, School of Electronics and Computer Science, University of Southampton, SO17 1BJ Southampton, UK*

<sup>6</sup>*Clinical Research Unit, Institut Català d'Oncologia, 08908 L'Hospitalet de Llobregat, Spain*

<sup>7</sup>*University of Texas Southwestern Medical Center, Departments of Anesthesiology and Pain Management, Neurology, and Biomedical Engineering Dallas, Texas 75390-9003, USA*

<sup>8</sup>*ICREA - Institució Catalana de Recerca i Estudis Avançats, 08010 Barcelona, Spain*

<sup>†</sup>*These authors contributed equally to this work*

\**clara.vilches@icfo.eu*

---

This supplement published with Optica Publishing Group on 6 September 2024 by The Authors under the terms of the [Creative Commons Attribution 4.0 License](https://creativecommons.org/licenses/by/4.0/) in the format provided by the authors and unedited. Further distribution of this work must maintain attribution to the author(s) and the published article's title, journal citation, and DOI.

Supplement DOI: <https://doi.org/10.6084/m9.figshare.26830069>

Parent Article DOI: <https://doi.org/10.1364/BOE.532052>

**PREDICTION OF RESPONSE TO ANTIANGIOGENIC SUNITINIB THERAPY BY NON-INVASIVE HYBRID DIFFUSE OPTICS IN RENAL CELL CARCINOMA:  
SUPPLEMENTAL DOCUMENT**

| <b>Tumor</b>                              | <b>Control</b> | <b>Treated</b> | <b>Statistics</b> |
|-------------------------------------------|----------------|----------------|-------------------|
| THC [ $\mu\text{M}$ ]                     | $68 \pm 35$    | $47 \pm 30$    | $p < 0.01$        |
| SO <sub>2</sub> [%]                       | $74 \pm 11$    | $70 \pm 9$     | $p = 0.01$        |
| BFI [ $10^{-8}\text{cm}^2\text{s}^{-1}$ ] | $3 \pm 2$      | $2 \pm 1$      | $p < 0.01$        |

  

| <b>Shoulder</b>       | <b>Control</b> | <b>Treated</b> | <b>Statistics</b> |
|-----------------------|----------------|----------------|-------------------|
| THC [ $\mu\text{M}$ ] | $40 \pm 8$     | $40 \pm 8$     | $p = 0.87$        |
| SO <sub>2</sub> [%]   | $54 \pm 5$     | $54 \pm 6$     | $p = 0.71$        |

**Table S1.** Mean values  $\pm$  standard deviation for THC, SO<sub>2</sub> and BFI for the whole treatment period, in tumor and shoulder positions, for treated (n = 22) and control animals (n = 13).

| <b>Group</b>              | <b>log(THC)</b> | <b>log(SO2)</b> | <b>log(BFI)</b> |
|---------------------------|-----------------|-----------------|-----------------|
| Responder – non-responder | 0.17            | 0.21            | 0.01 (*)        |
| Responder – control       | 0.77            | 0.20            | 0.88            |
| Non-responder – control   | 0.46            | 0.77            | 0.09            |

**Table S2.** Summary of pre-treatment tumor hemodynamics statistics (p values) among therapy outcomes. n = 13 controls, 8 non-responders, 14 responders.

| <b>Univariate analysis</b> | <b>AUC</b> | <b>p</b> | <b>P<sub>bs</sub></b> |
|----------------------------|------------|----------|-----------------------|
| THC                        | 0.68       | 0.15     | $\square$ 0.07        |
| SO <sub>2</sub>            | 0.68       | 0.14     | $\square$ 0.07        |
| BFI                        | 0.81       | 0.01     | $\leq$ 0.03           |

  

| <b>Multivariate analysis</b> | <b>AUC</b> | <b>p</b> | <b>P<sub>bs</sub></b> |
|------------------------------|------------|----------|-----------------------|
| THC & BFI                    | 0.79       | 0.047    | $\leq$ 0.049          |
| THC & SO <sub>2</sub>        | 0.67       | 0.320    | $\square$ 0.190       |
| BFI & SO <sub>2</sub>        | 0.79       | 0.052    | $\square$ 0.050       |

**Table S3.** Pre-treatment therapy outcome classification by binomial logistic regression.

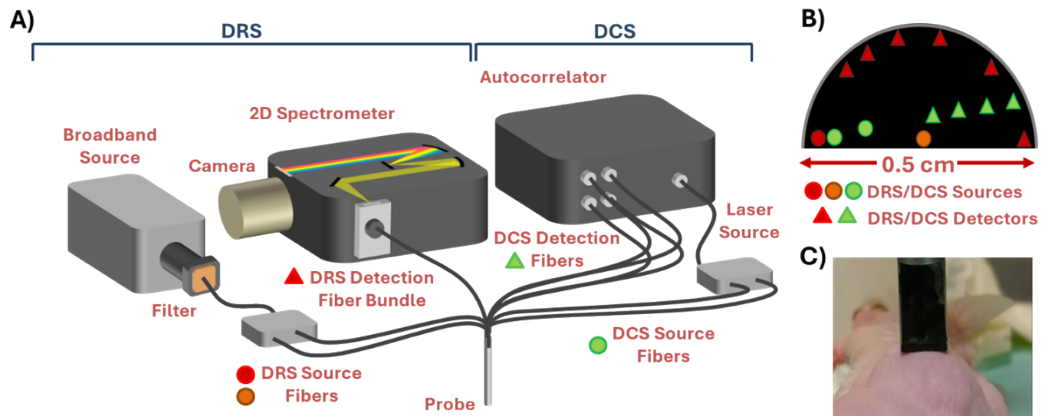

**Figure S1.** The hybrid DRS/DCS device. **A.** An illustration of the optical components of the hybrid DRS/DCS setup. **B.** A schematic of the tip of the contact hand-held probe composed of a set of fibers for light delivery (red/orange dots for DRS and green dots for DCS) and collection (red triangles for DRS and green triangles for DCS) into and from the tissue. **C.** A representative image of the probe placement on the tumor.

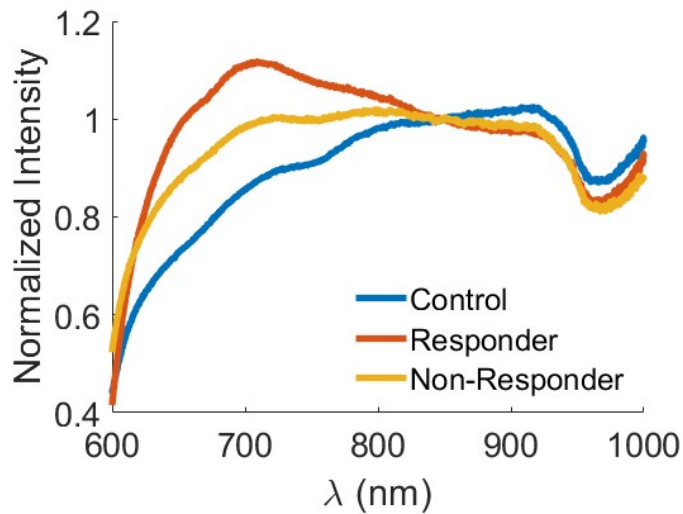

**Figure S2.** Example data of the calibrated optical measurements acquired at day 6 of treatment from the right-side of the tumor of a representative mouse in each of the therapy outcome groups (Control, Responder and Non-Responder) at 0.46 cm source-detector separation. Optical data was normalized at 850 nm for scaling purposes. Spectral shape differences reflect the complex interplay of the optical data due to heterogeneous tumor constituents.

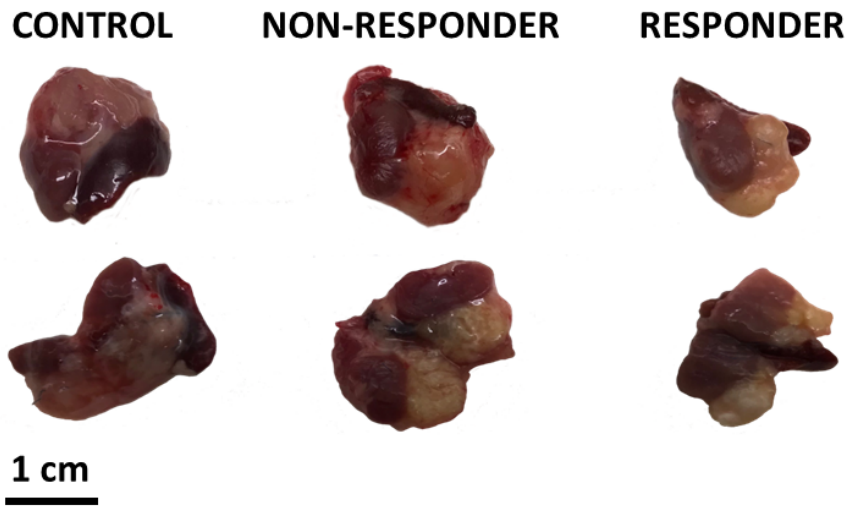

**Figure S3.** Representative images of control, responder and non-responder tumors at end point.

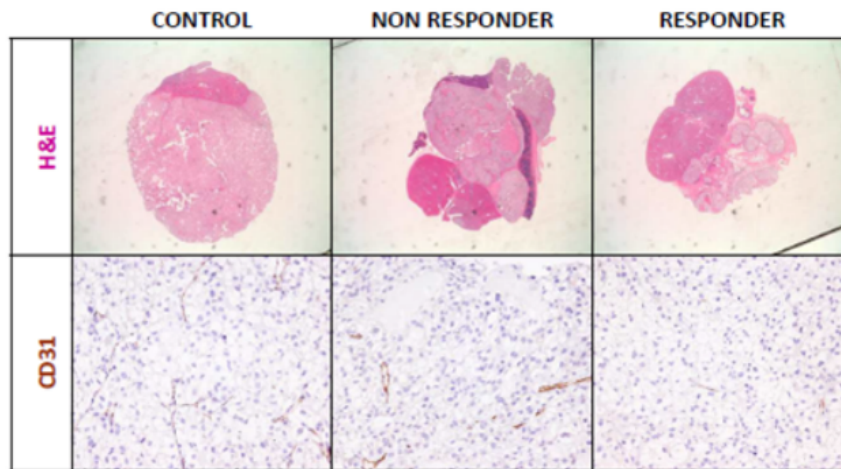

**Figure S4.** Representative images of hematoxylin and eosin stained tissue to quantify necrotic tumor areas (upper row) and immunohistochemical staining of CD31 to assess microvessel density (20x, bottom row).
